# Supplementary material
Source: PubMed Central journal article supplement (PMC10315268)
Supplement: kiad188_supplementary_data.pdf [file kiad188_supplementary_data.pdf]

**Supplementary Information:**

**Article title:** Ubiquitylation of PHYTOSULFOKINE RECEPTOR 1 modulates defense response in tomato

**Authors:** Zhangjian Hu, Hanmo Fang, Changan Zhu, Shaohan Gu, Shuting Ding, Jingquan Yu, and Kai Shi

The following supporting data are available for this article:

**Supplemental Figure S1** Phylogenetic analysis of partial PUBs from tomato and Arabidopsis

**Supplemental Figure S2** Effect of PSK application on PSKR1-PUB14 interaction

**Supplemental Figure S3** Effects of *B. cinerea* inoculation on the transcript expression of *PUBs* in tomato plants

**Supplemental Figure S4** Gene silencing efficiency of VIGS tomato plants

**Supplemental Figure S5** PUB12 and PUB13 have the E3 ligase enzyme activity

**Supplemental Figure S6** Schematic diagram showing Lys-748 and Lys-905 ubiquitination sites of PSKR1 by mass spectrum

**Supplemental Figure S1** Primers used in this study

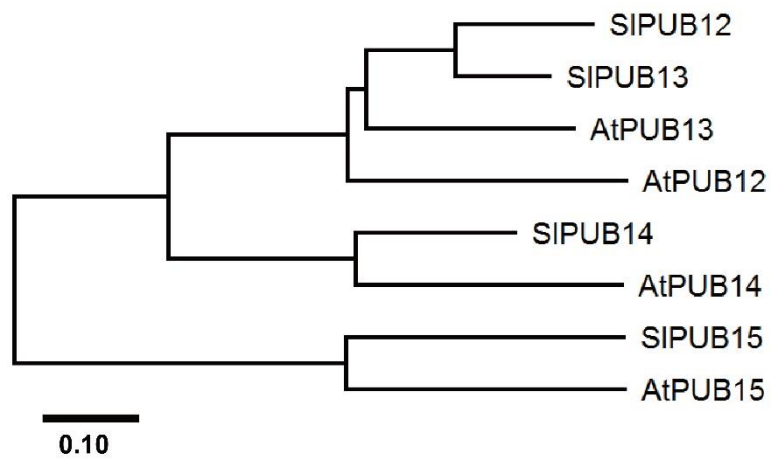

**Supplemental Figure S1. Phylogenetic analysis of partial PUBs from tomato and Arabidopsis.** The amino acid sequences of PUB12/13/14/15 were used for generating the phylogenetic tree by the neighbor-joining method using MEGAX program with 1000 bootstrap trails.

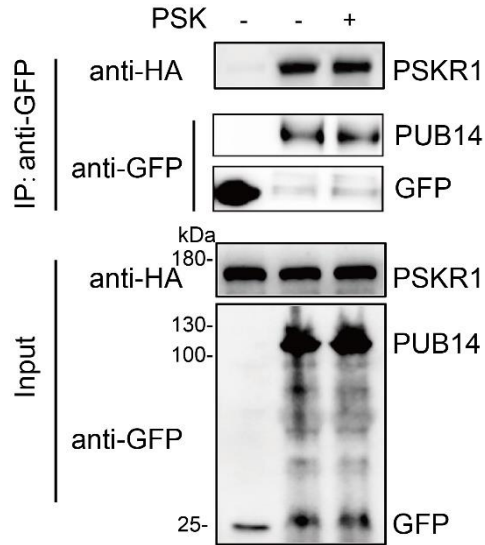

**Supplemental Figure S2. Effect of PSK application on PSKR1-PUB14 interaction.**

5-week-old fully expanded *N. benthamiana* leaves were co-transfected with PSKR1-HA and SIPUB14-GFP, or GFP control. After 48 h of inoculation, half of the leaves were infiltrated with 10  $\mu$ M PSK, and the other parts were infiltrated with dH<sub>2</sub>O control for 1 h before the sample collection for CoIP. The associations were detected by anti-HA and anti-GFP immunoblots. The protein levels before IP were detected by anti-HA immunoblot and anti-GFP antibody, respectively.

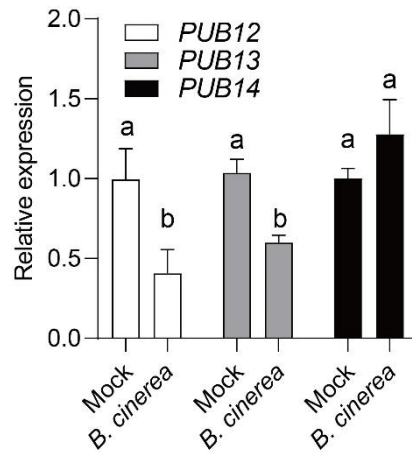

**Supplemental Figure S3. Effects of *B. cinerea* inoculation on the transcript expression of *PUBs* in tomato plants.** Five-week-old tomato plants were inoculated with *B. cinerea*, and the leaf samples were collected at 1 day post inoculation for RT-qPCR analysis. The transcript abundance of each gene under mock treatment was defined as 1. Data are presented as the means of three biological replicates ( $\pm$  SD,  $n=3$ ), and different letters indicate significant differences ( $P < 0.05$ ) according to Tukey's test.

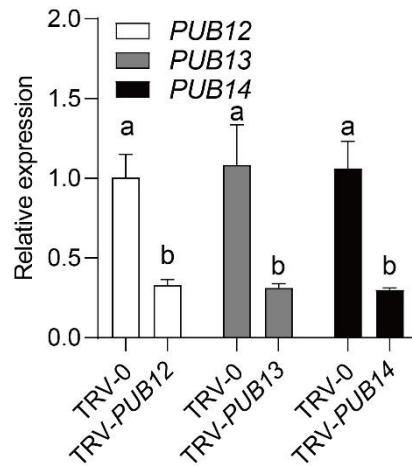

**Supplemental Figure S4. Gene silence efficiency of VIGS tomato plants.**

Approximately 4 weeks after the infiltration of *Agrobacterium* suspension carrying VIGS vectors, each plant was sampled from the uppermost 1 to 2 fully expanded leaf for gene silencing efficiency analysis. The transcript abundance of each gene in TRV-0 plants was defined as 1. Data are presented as the means of three biological replicates ( $\pm$  SD,  $n=3$ ), and different letters indicate significant differences ( $P < 0.05$ ) according to Tukey's test.

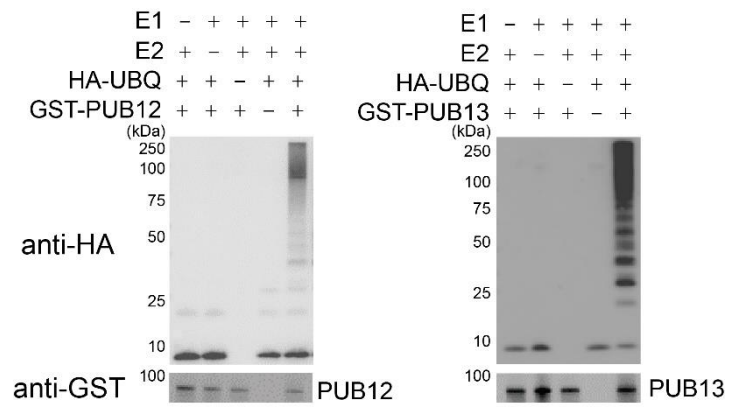

**Supplemental Figure S5. PUB12 and PUB13 have the E3 ligase enzyme activity.**

Ubiquitinated forms of GST-fusion proteins were evaluated in the presence of E1, E2, and ubiquitin. The reactions were analyzed by immunoblots using anti-HA antibody and anti-GST antibody.

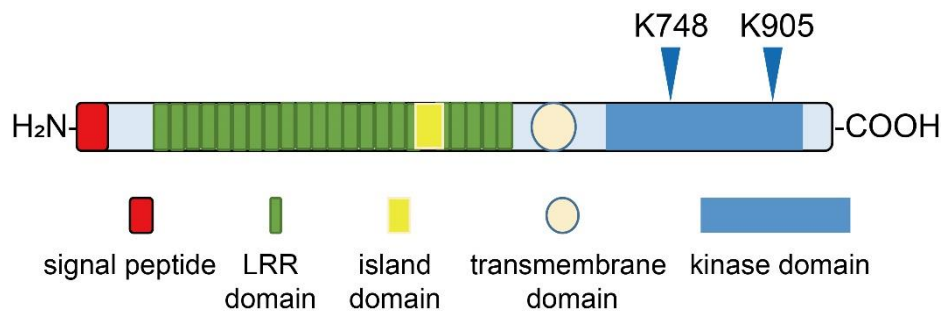

**Supplemental Figure S6. Schematic diagram showing Lys-748 and Lys-905 ubiquitination sites of PSKR1 by MS.**

**Supplemental Table S1. Primers used in this study**

| Gene         | Accession No.  | Primer pairs                                                                                                                | Assay     |
|--------------|----------------|-----------------------------------------------------------------------------------------------------------------------------|-----------|
| <i>PUB12</i> | Solyc11g066040 | F:5'- ACAGTGGTGTGAAGCGAATG -3'<br>R:5'- GGCTGCCAGATTTGAGCTTT -3'                                                            | qPCR      |
|              |                | F:5'- CGgaattcTGATGTCTTAAGGAGGTT -3'<br>R:5'- CGg gatccAATAGGGCAACGAAAA -3'                                                 | pTRV2     |
|              |                | F:5'- GgaattcATGGGAGAAGAAGATAAAGGAGAA -3'<br>R:5'- ACGCgtcgacACTCTCAATGGCATTAGTT -3'                                        | pGEX-4T-1 |
|              |                | F:5'- ggggacaagttgtacaaaaagcaggctttATGGGAGAAGAAGATAAAGG -3'<br>R:5'-ggggaccactttgtacaagaagctgggtcACTCTCAATGGCATTAGT -3'     | pDONR-Zeo |
|              |                | F:5'- CCttaaataaCATGGGAGAAGAAGATAAAGG -3'<br>R:5'- GGGactagtACTCTCAATGGCATTAGTTG -3'                                        | p2YC      |
| <i>PUB13</i> | Solyc06g076040 | F:5'- TATGTGTTGCGGAGCCTCAT -3'<br>R:5'- TGCATGCCGATGCTGATTTA -3'                                                            | qPCR      |
|              |                | F:5'- CGgaattcGAGCCAAAGGAAGGGTT -3'<br>R:5'- CGg gatccCCGCTACAAGTTGAAGAC -3'                                                | pTRV2     |
|              |                | F:5'- GgaattcATGGAAGAAGGAAGAGGAG -3'<br>R:5'- CCGctcgagTCAGCATTCCAGGACATTTG -3'                                             | pGEX-4T-1 |
|              |                | F:5'- ggggacaagttgtacaaaaagcaggctttATGGAAGAAGGAAGAGGA -3'<br>R:5'- ggggaccactttgtacaagaagctgggtcGCATTCCAGGACATTTGTCTCGA -3' | pDONR-Zeo |
|              |                | F:5'- CCCttaaataaCATGGAAGAAGGAAGAGGAG -3'<br>R:5'- GGGactagtGCATTCCAGGACATTTGTCTCG -3'                                      | p2YC      |
|              |                | F:5'- AggcgcgccATGGAAGAAGGAAGAGGAG -3'<br>R:5'- GGgtaccGCATTCCAGGACATTTGTCTCG -3'                                           | pAC004    |



|              |                |                                                                                                                               |                      |
|--------------|----------------|-------------------------------------------------------------------------------------------------------------------------------|----------------------|
| <b>PUB14</b> | Solyc11g008390 | F:5'- TGATGGATGAAGCACTTGCG -3'<br>R:5'- TCGGTTACGAGGAGAACCTG -3'                                                              | qPCR                 |
|              |                | F:5'- GgaattcATGGGTCATCAGAAAGA -3'<br>R:5'- CGgattccATTGTAAGGAATGTGGC -3'                                                     | pTRV2                |
|              |                | F:5'- GgaattcATGGGTCATCAGAAAGAGGA -3'<br>R:5'- CctcgagTGATTCAACTGGATCGACTC -3'                                                | pGEX-4T-1            |
|              |                | F:5'- ggggacaagttgtacaaaaagcaggctttATGGGTCATCAGAAAGAGG -3'<br>R:5'- ggggaccactttgtacaagaagctgggtcTGATTCAACTGGATCGAC -3'       | pDONR-Zeo            |
|              |                | F:5'- atttacgaacgatagttaattaaCATGGGTCATCAGAAAGAGGAATTAA -3'<br>R:5'- actgccacctcctccactagtTGATTCAACTGGATCGACTCGTT -3'         | p2YC                 |
| <b>PUB15</b> | Solyc04g082440 | F:5'- atttacgaacgatagttaattaaCATGGTATCAGCTGGGGAAATAGAA -3'<br>R:5'- actgccacctcctccactagtATATGGGATCTGCTCAGTTTTGG -3'          | p2YC                 |
|              |                | F:5'- ccgcgtggatccccggaattcATGGTATCAGCTGGGGAAATAGAA -3'<br>R:5'- gtcacgatcgccgctcgagATATGGGATCTGCTCAGTTTTGG -3'               | pGEX-4T-1            |
| <b>PSKRI</b> | Solyc01g008140 | F:5'- cagcaaatgggtcgggatccCGGGCAAGCAGTCGAAAA -3'<br>R:5'- tgcggccgcaagctgtcgcTCAAATAACATTTCTTTGCGTGCTG -3'                    | pET-28a              |
|              |                | F:5'- TGCtctagaATGCGGGCAAGCAGTCGAAAAAGT -3'<br>R:5'- AActgcagCACATGAACATCAGGTGGT -3'                                          | pMAL-c2x             |
|              |                | F:5'- ggggacaagttgtacaaaaagcaggctttATGGGTGTGTGCAAGTTTG -3'<br>R:5'- ggggaccactttgtacaagaagctgggtcCTAAAACACATGAACATCAGGTGG -3' | pDONR-Zeo            |
|              |                | F:5'- TTggcgcgccATGGTGATTTGGGAGTTTCT -3'<br>R:5'- CGGgtaccCTCTCCTTTACACTTGGGATTG -3'                                          | pAC004               |
|              |                | F:5'- CCCttaattaaCATGGGTGTGTTGCAAGTTTG -3'<br>R:5'- GGGactagtAAACACATGAACATCAGGTG -3'                                         | p2YN                 |
|              |                | F:5'- AGGGTCTCTATTGaacaaagcaccagtgtct -3';<br>R:5'- AGGGTCTCTAAACTGGGTTAGTTTCCTGATTATCtcaccagccgggaatcg -3'                   | pHEE401 (for CRISPR) |

|                 |                |                                                                                                               |                                    |
|-----------------|----------------|---------------------------------------------------------------------------------------------------------------|------------------------------------|
|                 |                | F:5'- GGAAACATTCCGGATGTGTT -3'<br>R:5'- AGGCTAGAATCAGTAGGCAA -3'                                              | <i>pskr1</i> mutant identification |
| <b>ACTIN</b>    | Solyc03g078400 | F: 5'-TGGTCGGAATGGGACAGAAG -3'<br>R: 5'-CTCAGTCAGGAGAACAGGGT -3'                                              | qPCR                               |
| <b>BcACTIN</b>  | XM_001553318.1 | F: 5'-GGTAACATTGTTATGTCTGG -3'<br>R: 5'-CTTGACCTTCATCGACG -3'                                                 | qPCR                               |
| <b>UBA(E1)</b>  | Solyc09g018450 | F:5'- ACGCgtcgcacAAATGCTTCCTGTGAAGAGGTC -3'<br>R:5'- CCGctcgagCTACTGAAATAAATAGAGAC -3'                        | pET-28a                            |
| <b>UBC8(E2)</b> | Solyc12g056100 | F:5'- CGgatccATGGCATCCAAGCGGATTCTCA -3'<br>R:5'- ACGCgtcgcacCTATCCCATGGCAAATTTTG -3'                          | pET-28a                            |
| <b>UBQ</b>      | Solyc01g096290 | F:5'- accatgggcgcgccggtaccATGCAGATCTTCGTGAAAACCTTAC -3'<br>R:5'- gtccttatagtcgatccCTTGATCTTCTTCTTTGGCCTCA -3' | pAC007                             |
| <b>MRN1</b>     | Solyc12g006530 | F:5'- GGCGGTTTAGCAGCATGGGA -3'<br>R:5'- TGCATTGACGTACTCGTGCT -3'                                              | qPCR                               |
| <b>RLKR</b>     | Solyc02g079990 | F:5'- AGGACCTAGGTGCAACTCCGT -3'<br>R:5'- TCCGACCTGGTGGTGGAGAA -3'                                             | qPCR                               |
| <b>SAG12</b>    | Solyc02g076910 | F:5'- ACCGGCCAACAACGAGAAGG -3'<br>R:5'- CCCATCGATTGCCACCGACA -3'                                              | qPCR                               |
| <b>PAD3</b>     | Solyc09g092600 | F:5'- TCGTGGGCTATTGCAAGGGA -3'<br>R:5'- GATCCACCGTCGCAACACCA -3'                                              | qPCR                               |
